## REFERENCES

1. Cook RI, McDonald JS, Nunziata E: Differences between hand-written and automatic blood pressure records. *ANESTHESIOLOGY* 71:385-390, 1989
2. Helsinki II Declaration, quoted in Silverman WA: *Human Experimentation: A guided Step into the Unknown*. New York, Oxford University Press, 1985, p 156

Anesthesiology  
72:578, 1990

*In Reply:*—We appreciate Dr. Solonuik's comments and agree that ethical standards are important and should receive the careful attention of all behavioral researchers. We did not observe the anesthesiologists' behavior but rather examined their records and, as we pointed out, took care to keep the identifiable characteristics of the data secure. There is a potential problem in detailed behavioral studies: were we to undertake a similar study today we should wish to make complete records of the anesthesiologist's behavior and we would obtain their consent in their role *qua* subjects. Our institutional review committee does not generally require informed consent for review of patient records, providing that appropriate safeguards are taken concerning con-

Anesthesiology  
72:578, 1990

## Humidification of Inspired Gas

*To the Editor:*—We read the article by Bissonnette *et al.*<sup>1</sup> and are concerned that both the temperature and absolute humidity of inspired gas were not considered by the authors. When artificial methods of humidification of inspired gas are considered, it is essential to think in terms of absolute humidity (the mass of water vapor in unit volume at given temp) and temperature.<sup>2</sup> Relative humidity is the amount of water vapor present in a gas at any given temperature expressed as a percentage of the amount of water vapor that the gas would hold if fully saturated at that temperature. The relative humidity of inspired gas was at 90% with active airway humidification. When the heat and moisture exchangers (passive humidification) were used, relative humidity was 50% at the beginning of anesthesia and gradually increased to 80% after 90 min. Since temperature of inspired air was not mentioned, it is reasonable to assume that it was 37° C and 25° C with active and passive humidification, respectively. The mass of water vapor in inspired gas would be 39.6 (44 × 0.90) mg/l with active humidification and 18.4 (23 × 0.8) mg/l with passive humidification after 90 min of anesthesia.<sup>2</sup> The water content in the inspired gas with active humidification is twice that with passive humidification. This demonstrates that absolute humidity in the inspired gas with active humidification was significantly greater than that with passive humidification and it is incorrect to conclude heat and moisture exchangers "after

Anesthesiology  
72:578-579, 1990

*In Reply:*—Drs. Sum-Ping and Mehta are mistaken in stating that "it is essential to think in terms of absolute humidity." Clinicians may humidify respiratory gases to: 1) prevent tracheopulmonary damage; and 2) minimize hypothermia. Tracheal ciliary function is well preserved when relative humidity is >50%, at a wide variety of inspired gas temperatures.<sup>1-3</sup> Ciliary function is minimally dependent on absolute

3. Lowe DU, Alexander DF: Informed consent and the rights of research subjects, *The Social Context of Medical Research*. Edited by Wechsler H, Lamont-Hawes RW, Cahill GF Jr, Cambridge, Ballinger, 1981, p 115
4. Beecher HK: Ethics and clinical research. *N Engl J Med* 274:1354-60, 1966

(Accepted for publication December 5, 1989.)

fidentiality. The anesthetic record is part of the greater patient record and, thus, would be covered by such a general practice.

RICHARD I. COOK, M.D.  
J. S. McDONALD, M.D.  
ENRICO NUNZIATA, M.S.B.M.E.  
*Department of Anesthesiology  
The Ohio State University Hospitals  
410 West 10th Avenue  
Columbus, Ohio 43210-1228*

(Accepted for publication December 5, 1989.)

approximately 1.5 h of anesthesia, provided nearly as much airway humidification as active systems."

JOHN S. T. SUM-PING, M.D.  
*Visiting Assistant Professor*

MAHESH P. MEHTA  
*Associate Professor*

*Department of Anesthesia  
University of Iowa College of Medicine  
Iowa City, Iowa 52242*

## REFERENCES

1. Bissonnette B, Sessler DI, LaFlamme P: Passive and active inspired gas humidification in infants and children. *ANESTHESIOLOGY* 71:350-354, 1989
2. Barnes PK: Principles of lung ventilators and humidification, *Scientific Foundations in Anaesthesia*. Edited by Scurr C, Feldman S. London, Heinemann 1982, pp. 533-544

(Accepted for publication December 6, 1989.)

humidity.<sup>4</sup> Furthermore, inspired gas temperatures sufficient to provide the highest absolute humidities actually decreases mucociliary function, functional residual capacity, and pulmonary compliance.<sup>5,6</sup>

Heat and moisture exchangers warm inspired gases as well as humidifying them (because the heat of condensed expired steam is absorbed and returned to inspired gas when the water evaporates).<sup>7,8</sup>

Furthermore, Drs. Sum-Ping and Mehta's assumptions about inspired gas temperatures,<sup>9</sup> expired gas humidity,<sup>10</sup> and the formula they use to estimate vapor mass<sup>11</sup> are incorrect. In any case, absolute inspired gas humidity is only important for its ability to decrease respiratory heat loss. Because we directly measured central temperature, we can conclude (without calculations) that both passive and active airway humidification minimize hypothermia.

In summary, both active and passive airway humidification provides sufficient moisture to prevent tracheal ciliary damage. Heat and moisture exchangers are about half as effective as active systems in preventing central hypothermia in anesthetized infants and children. Passive systems are, however, considerably less expensive and much easier to use than the active ones.

DANIEL I. SESSLER, M.D.  
*Assistant Professor of Anesthesia  
Department of Anesthesia  
University of California, San Francisco  
513 Parnassus Avenue  
San Francisco, California 94143*

BRUNO BISSONNETTE, M.D.  
*Assistant Professor of Anesthesia  
Department of Anesthesia  
Hospital for Sick Children  
555 University Avenue  
Toronto, Ontario  
Canada, M4Y 2W1*

## REFERENCES

1. Forbes AR: Humidification and mucus flow in the intubated trachea. *Br J Anaesth* 45:874-878, 1973
2. Chalon J, Loew DAY, Malebranche J: Effects of dry anesthetic gases on tracheobronchial ciliated epithelium. *ANESTHESIOLOGY* 37:338-343, 1972
3. Chalon J: Low humidity and damage to tracheal mucosa. *Bull N Y Acad Med* 56:314-322, 1980
4. Forbes AR: Temperature, humidity and mucus flow in the intubated trachea. *Br J Anaesth* 46:29-34, 1974
5. Noguchi H, Takumi Y, Aochi O: A study of humidification in tracheostomized dogs. *Br J Anaesth* 45:844-848, 1973
6. Mercke U: The influence of varying air humidity on mucociliary activity. *Acta Otolaryngol* 79:133-139, 1975
7. Revenas B, Lindholm CE: The foam nose—A new disposal heat and moisture exchanger. A comparison with other similar devices. *Acta Anaesthesiol Scand* 23:34-39, 1979
8. Ogino M, Kopotic R, Mannino FL: Moisture-conserving efficiency of condenser humidifiers. *Anaesthesia* 40:990-995, 1985
9. Mebius C: A comparative evaluation of disposable humidifiers. *Acta Anaesthesiol Scand* 27:403-409, 1983
10. McCutchan JW, Taylor CL: Respiratory heat exchange with varying temperature and humidity of inspired air. *J Appl Physiol* 4:121-135, 1951
11. Tilling SE, Hancox AJ, Hayes B: An accurate method of measuring medical humidifier output. *Clin Phys Physiol Meas* 4:197-209, 1983

(Accepted for publication December 6, 1989.)

## Preoperative Fasting of Children

*To the Editor:*—I read with concern the paper by Sandhar *et al.*<sup>1</sup> in which it was suggested that children may be given an unspecified amount of oral fluid 2.25 h before surgery without increasing the risk of pulmonary aspiration of gastric contents. This conclusion was largely based on the finding that a small volume of oral fluid (5 ml/kg) given to a limited number of patients 2-3 h preoperatively failed to produce a clinically significant increase in the gastric aspirate at induction of anesthesia. Moreover, 58% of patients given a drink received oral ranitidine, which reduced gastric volume, compared with 44% of patients who maintained their fast.

A further problem with Sandhar *et al.*'s paper is the reference to a study by Miller *et al.*<sup>2</sup> These authors claimed to have shown that giving gynecologic patients tea and toast 2-3 h preoperatively did not increase the volume of gastric contents at induction of anaesthesia. However, careful reading of the paper reveals that ten of their 23 "fed" patients had actually fasted more than 4 h and the mean fasting time for the group was 3.8 h.

In a previous study we showed that 10 ml/kg of oral fluid given 2-4 h preoperatively to unpremedicated children did produce a clinically significant increase in the residual gastric volume at induction of anesthesia.<sup>3</sup> Unless more substantial evidence can be produced to refute this, it would seem imprudent to abandon the established practice of withholding fluids from children for a minimum of 4 h preoperatively.

G. MEAKIN

*Lecturer in Pediatric Anesthesia  
Royal Manchester Children's Hospital  
Pendlebury, Manchester M27 1HA  
England*

## REFERENCES

1. Sandhar BK, Goresky GV, Maltby JR, Shaffer EA: Effect of oral liquids and ranitidine on gastric fluid volume and pH in children undergoing outpatient surgery. *ANESTHESIOLOGY* 71:327-330, 1989
2. Miller M, Wishart HY, Nimmo WS: Gastric contents at induction of anaesthesia. Is a 4-hour fast necessary? *Br J Anaesth* 55:1185-1187, 1983
3. Meakin G, Dingwall AE, Addison GM: Effects of fasting and oral premedication on the pH and volume of gastric aspirate in children. *Br J Anaesth* 59:678-682, 1987

(Accepted for publication December 21, 1989.)
